# Supplementary material for: The Involvement of miR-23a/APAF1 Regulation Axis in Colorectal Cancer
Source: PubMed Central journal article supplement (PMC4139809; doi:10.3390/ijms150711713), 2014-07-02
Supplement: ijms-15-11713-s001.pdf [file ijms-15-11713-s001.pdf]

## Supplementary Information

**Table S1.** Expression levels of miR-23a and *APAF1* in clinical carcinogenesis of colorectal cancer (CRC) samples. **(A)** Endogenous expressions of miR-23a and *APAF1* mRNA in the blood samples obtained from 32 healthy controls (CTL) and 70 CRC patients (C); assayed using RT-qPCR and expressed as fold change ( $2^{-\Delta\Delta C_t}$ ) value with respect to the healthy controls; and **(B)** Endogenous expressions of miR-23a, *APAF1* mRNA and APAF1 protein in the subset of 30 paired cancer tissues. Tissue miR-23a and *APAF1* mRNA levels were determined by RT-qPCR while tissue APAF1 protein expression was detected by Western blot. Expression value was calculated as fold change of cancer tissue versus the adjacent normal mucosa.

**Table S1. (A).**

| Blood Sample | Fold Change |                   | Blood Sample | Fold Change |                   |
|--------------|-------------|-------------------|--------------|-------------|-------------------|
|              | miR-23a     | <i>APAF1</i> mRNA |              | miR-23a     | <i>APAF1</i> mRNA |
| CTL_WB       | 1.2980      | 1.0336            | C_KX         | 5.1983      | 0.3260            |
| CTL_WC       | 2.1623      | 0.6431            | C_KY         | 0.5935      | 0.5320            |
| CTL_WD       | 2.7579      | 0.6115            | C_KZ         | 2.0115      | 0.2042            |
| CTL_WF       | 2.3725      | 0.8409            | C_LA         | 0.5299      | 0.4724            |
| CTL_XF       | 0.5650      | 1.8544            | C_LC         | 3.9284      | 0.4523            |
| CTL_XL       | 0.7041      | 2.4242            | C_LD         | 1.1560      | 0.3610            |
| CTL_XM       | 4.3584      | 0.4337            | C_LE         | 4.1912      | 0.4696            |
| CTL_XU       | 0.9979      | 2.1795            | C_LF         | 3.4732      | 0.1846            |
| CTL_XZ       | 0.6516      | 0.9474            | C_LG         | 0.5006      | 1.4162            |
| CTL_YA       | 0.7401      | 1.3008            | C_LI         | 2.0944      | 0.5052            |
| CTL_YC       | 1.2297      | 1.3128            | C_LJ         | 1.1709      | 0.5610            |
| CTL_YD       | 2.2761      | 0.9059            | C_LK         | 1.0853      | 0.5820            |
| CTL_YF       | 0.9529      | 2.4128            | C_LM         | 0.9533      | 0.2313            |
| CTL_YH       | 1.3371      | 1.7461            | C_LN         | 0.3992      | 0.3053            |
| CTL_YJ       | 0.5298      | 0.7091            | C_LO         | 1.1179      | 1.0678            |
| CTL_YL       | 0.7726      | 1.2841            | C_LP         | 0.0724      | 0.2916            |
| CTL_YN       | 2.6184      | 1.3244            | C_LQ         | 1.4897      | 2.5796            |
| CTL_YO       | 2.4846      | 0.5803            | C_LR         | 0.2032      | 0.1669            |
| CTL_YQ       | 1.0988      | 2.3799            | C_LS         | 1.2425      | 1.4301            |
| CTL_YW       | 4.5931      | 1.8306            | C_LU         | 2.6450      | 0.2668            |
| CTL_ZB       | 0.1561      | 1.2619            | C_LX         | 2.0178      | 1.3228            |
| CTL_ZF       | 0.1544      | 2.5886            | C_LY         | 2.9558      | 1.1050            |
| CTL_ZJ       | 0.1636      | 1.9763            | C_LZ         | 1.1938      | 1.7919            |
| CTL_ZM       | 0.6988      | 1.3223            | C_MA         | 1.1491      | 0.4676            |
| CTL_ZN       | 1.2166      | 2.9708            | C_MB         | 3.0863      | 0.4327            |
| CTL_ZP       | 2.9786      | 0.3963            | C_MC         | 0.7103      | 1.4348            |
| CTL_ZQ       | 0.1874      | 0.2099            | C_MD         | 1.6959      | 0.7204            |
| CTL_ZR       | 0.1758      | 0.1302            | C_MG         | 1.0279      | 1.7903            |

Table S1. (A). *Cont.*

| Blood Sample | Fold Change |                   | Blood Sample | Fold Change |                   |
|--------------|-------------|-------------------|--------------|-------------|-------------------|
|              | miR-23a     | <i>APAF1</i> mRNA |              | miR-23a     | <i>APAF1</i> mRNA |
| CTL_ZT       | 0.7534      | 0.1883            | C_MI         | 2.2409      | 0.2308            |
| CTL_ZW       | 1.0035      | 0.4654            | C_MK         | 1.2518      | 0.1457            |
| CTL_ZY       | 1.8724      | 1.5038            | C_ML         | 2.2431      | 0.3427            |
| CTL_ZZ       | 2.9238      | 1.0102            | C_MN         | 2.6407      | 0.1910            |
| C_C          | 10.0868     | 1.2307            | C_MO         | 0.7173      | 1.1146            |
| C_F          | 0.7284      | 1.2467            | C_MP         | 2.7526      | 1.2497            |
| C_G          | 6.7512      | 0.3446            | C_MS         | 0.7668      | 0.2584            |
| C_H          | 1.0948      | 0.4548            | C_MV         | 1.7642      | 1.3794            |
| C_KA         | 4.4825      | 0.9426            | C_MW         | 2.7149      | 0.2476            |
| C_KB         | 1.6411      | 0.9520            | C_MX         | 2.5130      | 0.3123            |
| C_KD         | 1.5969      | 0.4207            | C_MY         | 2.8983      | 0.9169            |
| C_KF         | 0.8814      | 1.3852            | C_MZ         | 1.2831      | 0.3894            |
| C_KG         | 0.8886      | 0.1956            | C_NA         | 0.7897      | 0.1392            |
| C_KH         | 1.1223      | 1.0171            | C_ND         | 2.2929      | 1.5791            |
| C_KI         | 0.9392      | 1.4141            | C_NG         | 1.7315      | 1.2542            |
| C_KJ         | 0.8325      | 1.3964            | C_NH         | 1.7607      | 1.7045            |
| C_KK         | 0.7216      | 0.5864            | C_NI         | 2.0009      | 0.8834            |
| C_KM         | 2.2030      | 0.3590            | C_NL         | 2.8009      | 1.2504            |
| C_KN         | 4.5832      | 0.6276            | C_NN         | 1.4899      | 0.8348            |
| C_KR         | 0.9345      | 0.3744            | C_NQ         | 1.7284      | 0.2657            |
| C_KS         | 1.1212      | 1.0523            | C_NR         | 0.9127      | 0.1450            |
| C_KT         | 2.6839      | 0.8877            | C_NS         | 0.8104      | 1.3975            |
| C_KU         | 0.7299      | 0.2022            | C_NV         | 1.6145      | 1.4826            |

Table S1. (B).

| Paired Tissue Sample | Fold Change |                   |                      |
|----------------------|-------------|-------------------|----------------------|
|                      | miR-23a     | <i>APAF1</i> mRNA | <i>APAF1</i> Protein |
| C_KB                 | 0.8183      | 0.3013            | 0.4469               |
| C_KF                 | 0.5263      | 0.3939            | 0.7943               |
| C_KG                 | 1.0981      | 0.3946            | 0.9720               |
| C_KI                 | 0.6040      | 0.7304            | 1.2070               |
| C_KN                 | 3.4987      | 0.1597            | 0.8361               |
| C_KS                 | 1.7579      | 0.1089            | 0.6136               |
| C_KU                 | 0.7696      | 0.0221            | 1.0867               |
| C_KX                 | 6.6793      | 0.0800            | 0.6592               |
| C_KY                 | 0.5172      | 0.4202            | 0.7827               |
| C_LC                 | 2.0456      | 0.1775            | 0.3421               |
| C_LE                 | 5.6637      | 0.1506            | 0.4178               |
| C_LF                 | 5.0208      | 0.1050            | 0.6098               |
| C_LJ                 | 2.2800      | 0.1404            | 0.8293               |
| C_LK                 | 2.5638      | 0.4111            | 0.8709               |
| C_LM                 | 2.4835      | 0.0774            | 0.4970               |
| C_LP                 | 0.1329      | 0.5655            | 0.8649               |
| C_LR                 | 0.7905      | 0.1955            | 1.1586               |
| C_LX                 | 1.7387      | 0.1741            | 0.6734               |
| C_LY                 | 4.7860      | 0.1548            | 0.5479               |
| C_ML                 | 3.9549      | 0.0482            | 0.8409               |
| C_MN                 | 3.0303      | 0.0437            | 0.5981               |
| C_MS                 | 0.3240      | 0.2913            | 1.1646               |
| C_MV                 | 1.1640      | 0.1930            | 0.3855               |
| C_MY                 | 4.0591      | 0.0959            | 0.5341               |
| C_NA                 | 0.1988      | 0.2330            | 1.1435               |
| C_NH                 | 1.8119      | 0.2538            | 0.7696               |
| C_NI                 | 2.1900      | 0.1603            | 0.4717               |
| C_NQ                 | 1.4088      | 0.1835            | 0.9567               |
| C_NR                 | 0.9086      | 0.2163            | 0.5861               |
| C_NV                 | 3.8037      | 0.7431            | 0.8116               |
